# Supplementary material for: Extracellular vesicles with high dual drug loading for safe and efficient combination chemo-phototherapy
Source: Royal Society of Chemistry journal article supplement (doi:10.1039/d1bm02005f), 2022-01-01
Supplement: d1bm02005f1.pdf [file d1bm02005f1.pdf]

## Supporting Information

### **Extracellular vesicles with high dual drug loading for safe and efficient combination chemo-phototherapy**

Sumin Kim<sup>1,†</sup>, Ji Hee Kang<sup>2,†</sup>, Thuy Giang Nguyen Cao<sup>3,†</sup>, Su Jin Kang<sup>3,†</sup>, Kyeongsoo Jeong<sup>3</sup>, Han Chang Kang<sup>1</sup>, Young Jik Kwon<sup>4,5,6,7,\*</sup>, Won Jong Rhee<sup>3,8,\*</sup>, Young Tag Ko<sup>2,\*</sup>, Min Suk Shim<sup>3,\*</sup>

<sup>1</sup>Department of Pharmacy, Integrated Research Institute of Pharmaceutical Sciences, and BK21 PLUS Team for Creative Leader Program for Pharmacomics-based Future Pharmacy, College of Pharmacy, The Catholic University of Korea, Gyeonggi-do 14662, Republic of Korea

<sup>2</sup>College of Pharmacy, Gachon University, Incheon 21936, Republic of Korea

<sup>3</sup>Division of Bioengineering, Incheon National University, Incheon 22012, Republic of Korea

<sup>4</sup>Department of Pharmaceutical Sciences, University of California, Irvine, CA 92697, USA

<sup>5</sup>Department of Chemical and Biomolecular Engineering, University of California, Irvine, CA 92697, USA

<sup>6</sup>Department of Molecular Biology and Biochemistry, University of California, Irvine, CA 92697, USA

<sup>7</sup>Department of Biomedical Engineering, University of California, Irvine, CA 92697, USA

<sup>8</sup>Research Center for Bio Materials & Process Development, Incheon National University, 119 Academy-ro, Yeonsu-gu, Incheon 22012, Republic of Korea

[†] These authors contributed equally to this work.

\*Corresponding authors:

Dr. Young Jik Kwon, Tel: +1-949-824-8714; E-mail address: [kwonyj@uci.edu](mailto:kwonyj@uci.edu)

Dr. Won Jong Rhee, Tel: +82-32-835-8299; E-mail address: [wjrhee@inu.ac.kr](mailto:wjrhee@inu.ac.kr)

Dr. Young Tag Ko, Tel: +82-32-820-4923; E-mail address: [youngtakko@gachon.ac.kr](mailto:youngtakko@gachon.ac.kr)

Dr. Min Suk Shim, Tel: +82-32-835-8268; E-mail address: [msshim@inu.ac.kr](mailto:msshim@inu.ac.kr)

**Table S1.** Size changes of EV(ICG/PTX) incubated in 5% FBS-containing PBS for various periods of time.

| Incubation time (h) | Size (nm) |
|---------------------|-----------|
| 0                   | 155.7±2.4 |
| 4                   | 149.1±2.5 |
| 12                  | 156.0±4.3 |
| 72                  | 156.2±6.6 |
| 96                  | 155.2±6.2 |
| 120                 | 150.0±5.0 |

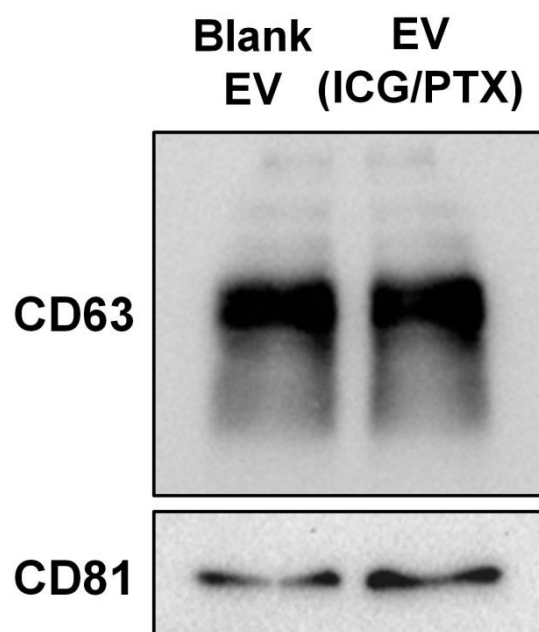

**Figure S1.** Western blot of marker proteins, CD63 and CD81 from blank EVs and EV(ICG/PTX).

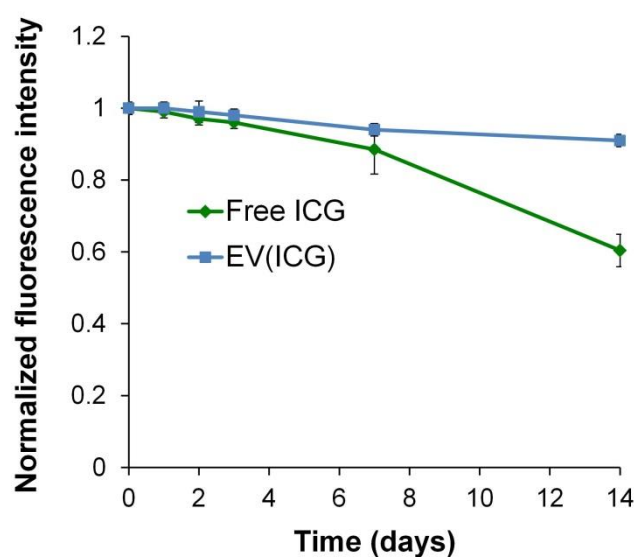

**Figure S2.** Fluorescence intensity changes of free ICG and EV(ICG) in PBS at 4 °C for 14 days.

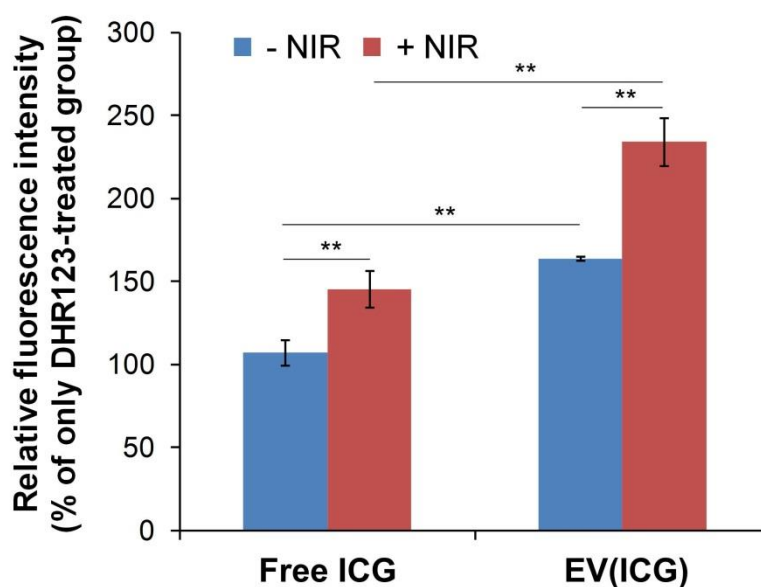

**Figure S3.** Relative ROS generation from free ICG and EV(ICG) in DI water before and after NIR light irradiation, determined by dihydrorohdamine 123 (DHR123) staining. The fluorescence intensities of free ICG and EV(ICG) groups were normalized by the fluorescence intensity of the sample treated with DHR123 only in DI water (\*\* $p < 0.01$ ).

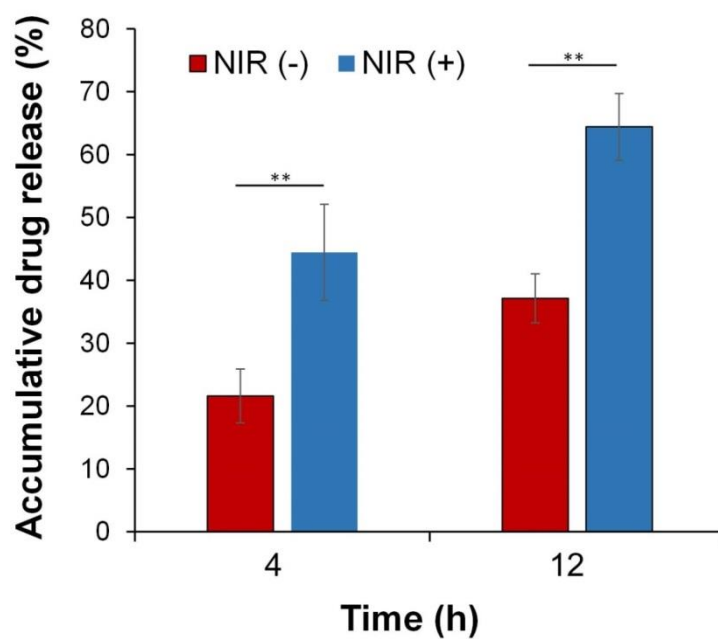

**Figure S4.** Drug release profiles of PTX from EV(ICG/PTX) in the absence or presence of NIR light irradiation (100 s) at different incubation time. The PTX release from the EV(ICG/PTX) was facilitated when exposed to NIR light (\*\* $p < 0.01$ ).

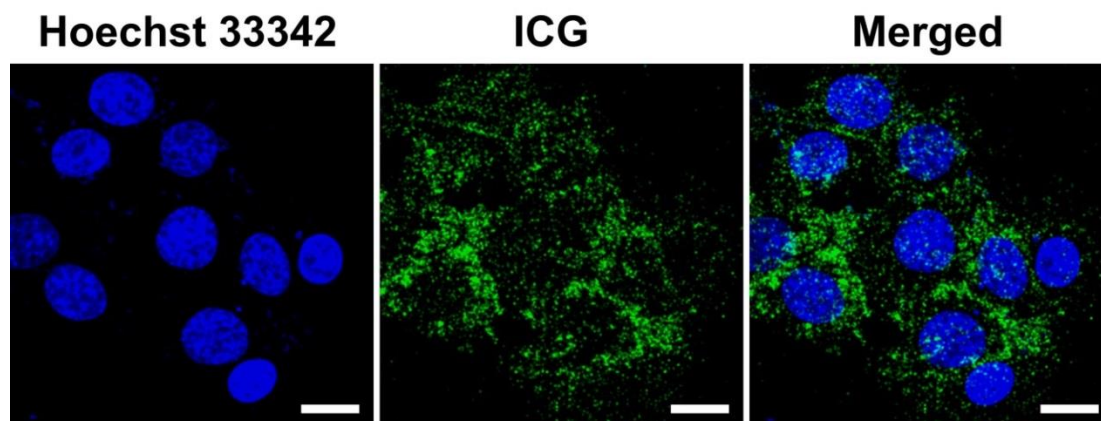

**Figure S5.** Live confocal microscopic images of MCF-7 cells treated with free ICG (green dots). Hoechst 33342 (blue dots) was used to stain cellular nuclei. Scale bars indicate 20  $\mu\text{m}$ .

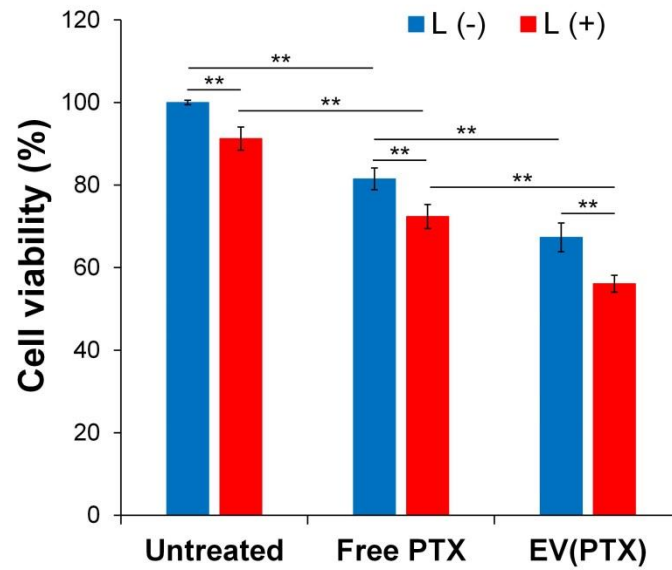

**Figure S6.** Cell viability of MCF-7 cells after treatments with free PTX and EV(PTX) (9  $\mu\text{g/mL}$  PTX) before and after NIR light irradiation ( $0.8 \text{ W/cm}^2$ , 100 s) (\*\* $p < 0.01$ ).

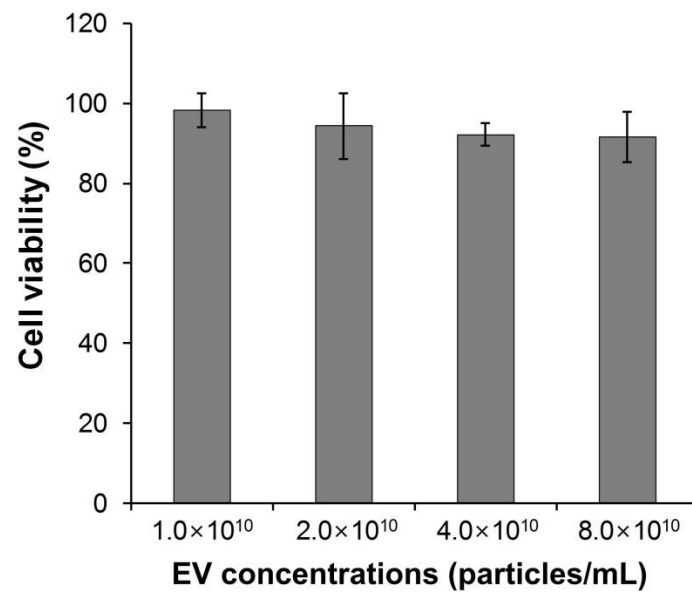

**Figure S7.** Cell viability of MCF-7 cells after treatment with blank EVs at different concentrations.

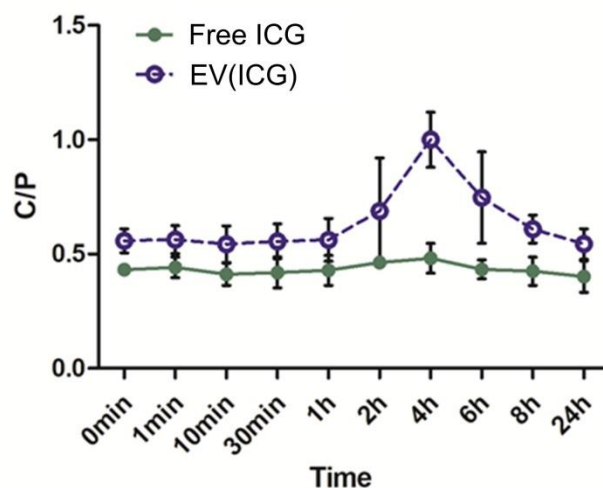

**Figure S8.** Time course graph of fluorescence intensity ratio of tumor core area/peritumoral tissue area (C/P) in the free ICG or EV(ICG)-treated mice ( $n = 4$ ).

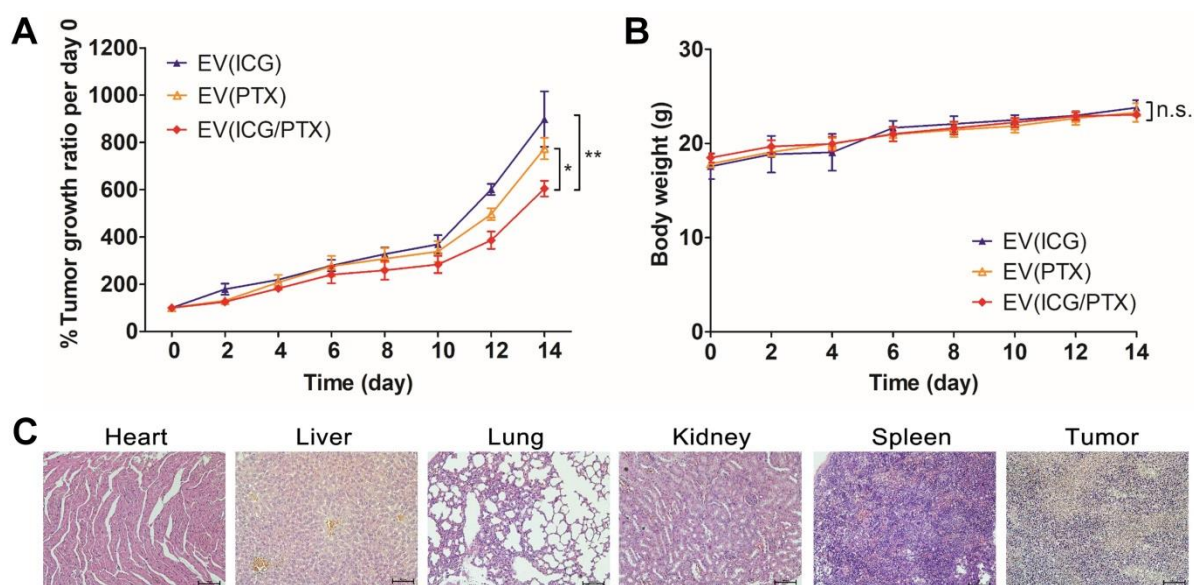

**Figure S9.** (A) Normalized tumor growth ratio of MCF-7 tumor-bearing mice treated with EV(PTX) compared to that with EV(ICG) and EV(ICG/PTX). The mice were irradiated with an 808 nm laser at  $0.8 \text{ W/cm}^2$  for 5 min at 4 h after i.v. injection of each sample. (B) Body weights of MCF-7 tumor-bearing mice ( $n = 4$ ) as a function of time after treatment with each sample and NIR laser irradiation ( $0.8 \text{ W/cm}^2$ , 5 min) (\* $p < 0.05$ ; \*\* $p < 0.01$ ; n.s.: not significant). (C) H&E staining of major organ and MCF-7 tumor of mice at day 14 after treatment with EV(PTX) and NIR light irradiation. Scale bars indicate 100  $\mu\text{m}$ .

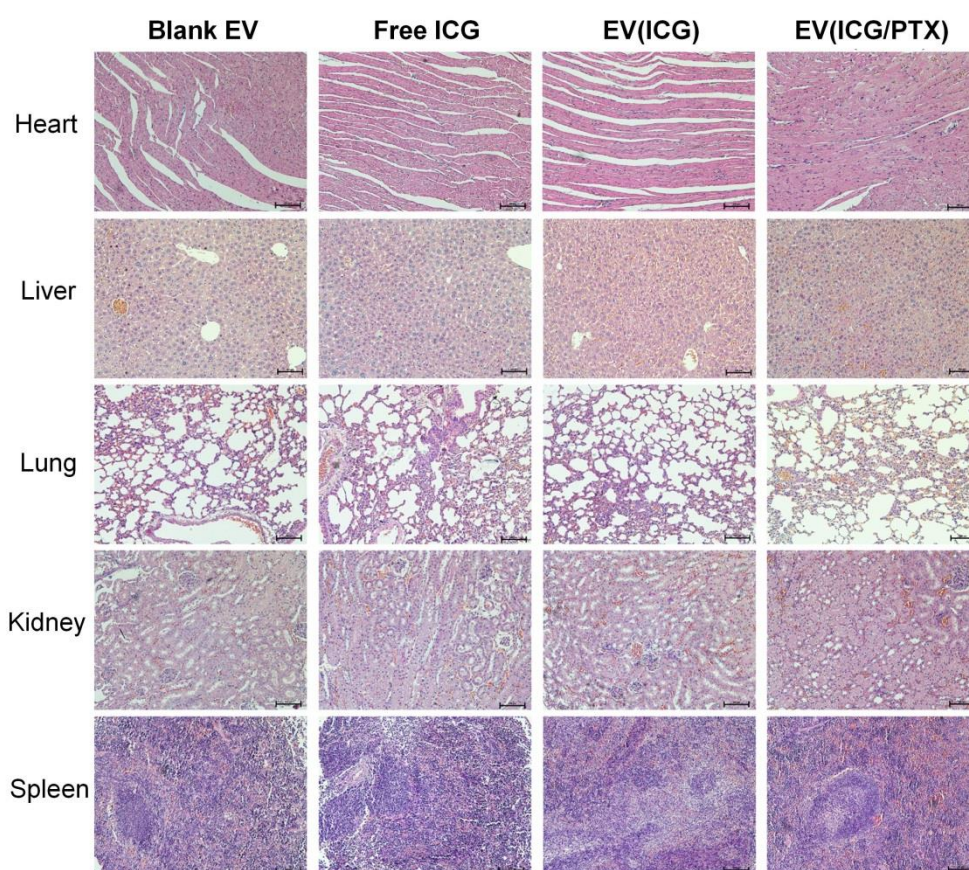

**Figure S10.** H&E staining of major organ tissues of the mice after 14 days post injection with various samples [e.g., blank EV, free ICG, EV(ICG), and EV(ICG/PTX)] and NIR light irradiation ( $0.8 \text{ W/cm}^2$  for 5 min). Scale bars indicate  $100 \mu\text{m}$ .
